# Supplementary material for: Medication Errors in Prehospital Management of Simulated Pediatric Anaphylaxis
Source: Atypon-hosted journal article supplement (doi:10.3109/10903127.2013.856501), 2014-01-08
Supplement: anaphylaxis-scenario.pdf [file anaphylaxis-scenario.pdf]

 


Log in
 | 

Register

Cart

1. Home

### Information for

- Authors
- R&D professionals
- Editors
- Librarians
- Societies

### Open access

- Overview
- Open journals
- Open Select
- Dove Medical Press
- F1000Research

### Opportunities

- Reprints and e-prints
- Advertising solutions
- Accelerated publication
- Corporate access solutions

### Help and information

- Help and contact
- Newsroom
- All journals
- Books

### Keep up to date

Register to receive personalised research and resources by email

Sign me up

Taylor and Francis Group Facebook page

Taylor and Francis Group X Twitter page

Taylor and Francis Group Linkedin page

Taylor and Francis Group Youtube page

Taylor and Francis Group Weibo page

Copyright © 2024**Informa UK Limited**
Privacy policy
Cookies
Terms & conditions
Accessibility

Registered in England & Wales No. 3099067  
5 Howick Place | London | SW1P 1WG
